# Supplementary material for: Risk factors for herpes zoster in Korean patients with rheumatoid arthritis treated with JAK inhibitor: a nested case–control study
Source: HighWire-hosted journal article supplement (doi:10.1136/rmdopen-2021-001892), 2022-01-01
Supplement: rmdopen-2021-001892supp001_data_supplement.pdf [file rmdopen-2021-001892supp001_data_supplement.pdf]

Supplementary Table 1. Characteristics of HZ cases among JAKi users

|                   | Age | Gender | Duration of treatment with JAKi* |       | MTX | History of treatment with bDMARD | HZ vaccination |
|-------------------|-----|--------|----------------------------------|-------|-----|----------------------------------|----------------|
|                   |     |        | until HZ development             | total |     |                                  |                |
| <b>Patient 1</b>  | 63  | female | 9.4                              | 9.9   | yes | no                               | yes            |
| <b>Patient 2</b>  | 63  | female | 8.8                              | 11.8  | yes | no                               | no             |
| <b>Patient 3</b>  | 60  | female | 32.1                             | 37.0  | yes | yes                              | no             |
| <b>Patient 4</b>  | 39  | female | 5.0                              | 5.6   | no  | no                               | no             |
| <b>Patient 5</b>  | 57  | female | 11.2                             | 20.2  | yes | yes                              | yes            |
| <b>Patient 6</b>  | 45  | female | 21.5                             | 26.6  | yes | yes                              | no             |
| <b>Patient 7</b>  | 54  | female | 12.2                             | 20.9  | yes | no                               | no             |
| <b>Patient 8</b>  | 72  | female | 5.1                              | 16.2  | yes | no                               | no             |
| <b>Patient 9</b>  | 69  | female | 4.7                              | 16.2  | yes | no                               | no             |
| <b>Patient 10</b> | 72  | female | 4.5                              | 18.8  | yes | yes                              | no             |
| <b>Patient 11</b> | 57  | female | 6.7                              | 22.5  | no  | yes                              | no             |
| <b>Patient 12</b> | 66  | female | 12.6                             | 31.6  | yes | no                               | no             |
| <b>Patient 13</b> | 57  | male   | 10.5                             | 25.6  | no  | yes                              | no             |
| <b>Patient 14</b> | 69  | female | 9.9                              | 28.1  | yes | yes                              | no             |
| <b>Patient 15</b> | 63  | female | 1.8                              | 23.0  | yes | yes                              | no             |
| <b>Patient 16</b> | 60  | female | 2.7                              | 27.9  | yes | yes                              | no             |
| <b>Patient 17</b> | 36  | female | 2.7                              | 38.8  | yes | yes                              | no             |

HZ, herpes zoster; JAKi, Janus kinase inhibitor; MTX, methotrexate; bDMARD, biologic disease-modifying antirheumatic drug.

\*Values are presented as months. Each values are duration from the initiation of JAKi to HZ development, and to the end of medication use within the observation period.

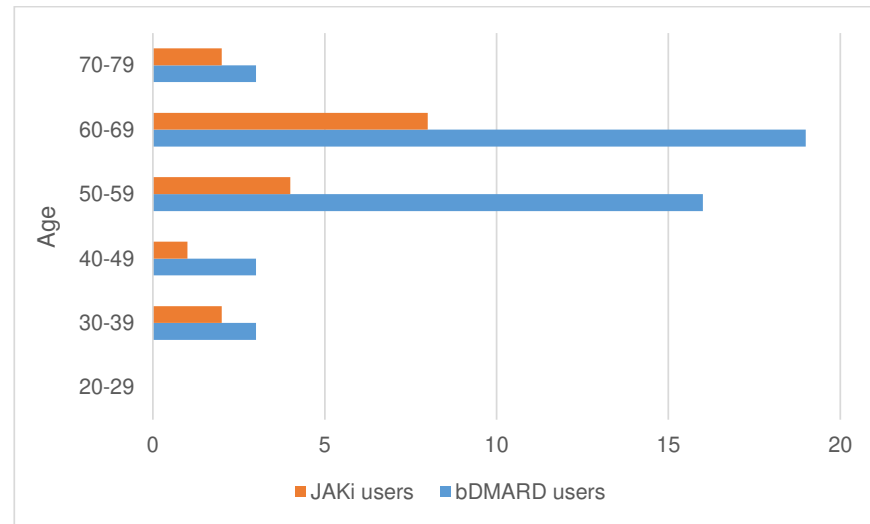

Supplementary Figure 1. Number of cases diagnosed with herpes zoster by age group

JAKi, Januse kinase inhibitor; bDMARD, biologic disease-modifying antirheumatic drug
